# Supplementary material for: Association of Alpha-1 Antitrypsin Pi*Z Allele Frequency and Progressive Liver Fibrosis in Two Chronic Hepatitis C Cohorts
Source: MDPI journal article supplement (doi:10.3390/jcm12010253), 2022-12-29

## Supporting information

Mücke et al.: Association of alpha-1 antitrypsin allele Pi\*Z frequency and progressive liver fibrosis in two chronic hepatitis C cohorts

**Table S1.** Patients' characteristics of the Leipzig cohort.

| Parameters                   | Total, <i>n</i> =235 | Pi*Z non-carriers, <i>n</i> =225 | Pi*Z carriers, <i>n</i> =10 | Significance ( <i>p</i> value) |
|------------------------------|----------------------|----------------------------------|-----------------------------|--------------------------------|
| Age (years)                  | 53.6±13.9            | 53.7±14.0                        | 53.4±12.6                   | 0.874                          |
| Men ( <i>n</i> )             | 125 (45.5)           | 108 (48)                         | 7 (70)                      | 0.208                          |
| BMI (kg/m <sup>2</sup> )     | 23.3±6.4             | 23.0±6.1                         | 31.9±10.7                   | 0.053                          |
| ALT (U/l)                    | 76.4±58.7            | 77.9±59.5                        | 45.1±20.8                   | 0.107                          |
| AST (U/l)                    | 75.6±54.7            | 76.5±55.6                        | 55.8±19.4                   | 0.490                          |
| GGT (U/l)                    | 110.5±172.8          | 110.9±175.6                      | 101.6±85.8                  | 0.524                          |
| Bilirubin (mg/dl)            | 16.5±12.8            | 16.6±12.9                        | 13.4±9.3                    | 0.354                          |
| Albumin (g/dl)               | 3.6±0.8              | 3.6±0.8                          | 3.5±0.5                     | 0.449                          |
| Platelets (/nl)              | 169±81               | 171±80                           | 146±91                      | 0.284                          |
| <b>HCV genotype 3</b>        | 25 (10.6)            | 23 (10.2)                        | 2 (20)                      | 0.288                          |
| <b>Diabetes mellitus</b>     | 46 (19.6)            | 44 (8.6)                         | 2 (20)                      | 1.0                            |
| <b>Arterial hypertension</b> | 89 (37.8)            | 86 (38.2)                        | 3 (30)                      | 0.746                          |

Abbreviations: BMI, body mass index; HCV, hepatitis C virus, ALT, alanine transferase; AST, aspartate transferase; GGT, gamma glutamyl-transferase. Missing data: age *n*=2; BMI *n*=30, ALT *n*=13, AST *n*=12, GGT *n*=15, bilirubin *n*=24, albumin *n*=34, platelets *n*=14, HCV genotype *n*=13.

**Table S2.** Multivariable analysis of the binary outcome liver cirrhosis and no liver cirrhosis of the Leipzig cohort.

| Variables ( <i>n</i> =219) | Univariable analysis |                | Multivariable analysis |                |
|----------------------------|----------------------|----------------|------------------------|----------------|
|                            | OR (95% CI)          | <i>p</i> value | OR (95% CI)            | <i>p</i> value |
| Age                        | 1.040 (1.016-1.064)  | <0.001         | 1.037 (1.013-1.062)    | 0.003          |
| Female sex                 | 0.529 (0.299-0.937)  | 0.029          |                        |                |
| Body mass index            | 1.047 (1.025-1.069)  | <0.001         | 1.046 (1.023-1.069)    | <0.001         |

|                       |                     |       |
|-----------------------|---------------------|-------|
| Genotype 3            | 1.329 (0.549-3.242) | 0.532 |
| Diabetes mellitus     | 2.156 (1.054-4.411) | 0.035 |
| Arterial hypertension | 2.150 (1.200-3.851) | 0.010 |
| Pi*Z heterozygosity   | 1.646 (0.426-6.367) | 0.470 |

**Figure S1.** No difference in Pi\*Z carrier frequencies in different stages of serologically defined liver fibrosis. Comparison of HCV patients of the Frankfurt cohort with aspartate transferase to platelet ratio index (APRI) <0.5 versus >1 (**A**) and fibrosis-4 score (FIB-4) <1.45 versus >3.25 (**B**). Proportions of Pi\*Z carriers (%) are depicted next to the bars.

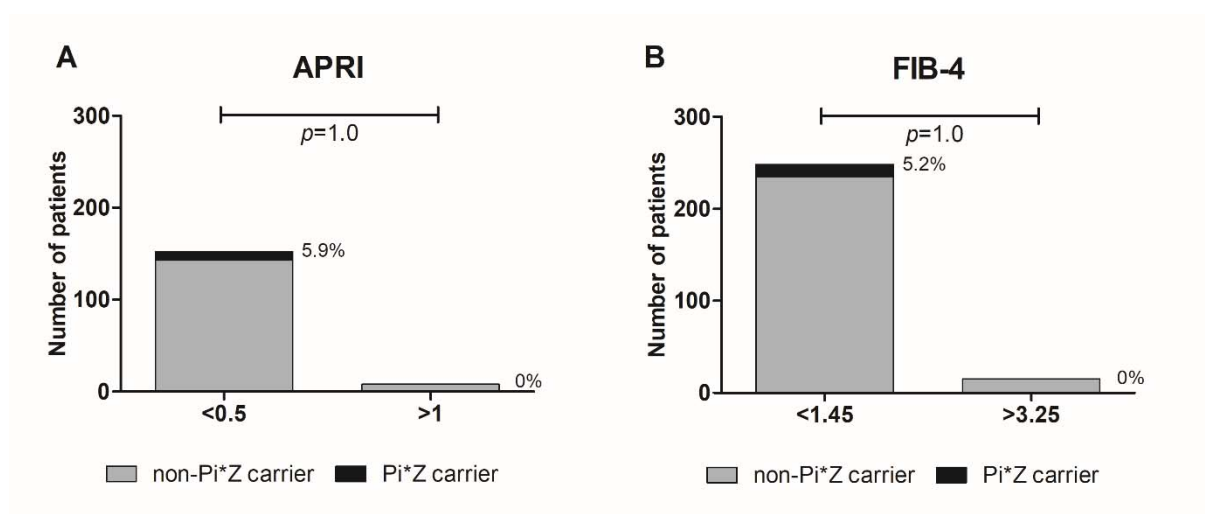

**Figure S2.** No difference in Pi\*Z carrier frequencies in different stages of serologically defined liver fibrosis. Comparison of HCV patients of the Leipzig cohort with aspartate transferase to platelet ratio index (APRI) <0.5 versus >1 (**A**) and fibrosis-4 score (FIB-4) <1.45 versus >3.25 (**B**). Proportions of Pi\*Z carriers (%) are depicted next to the bars.

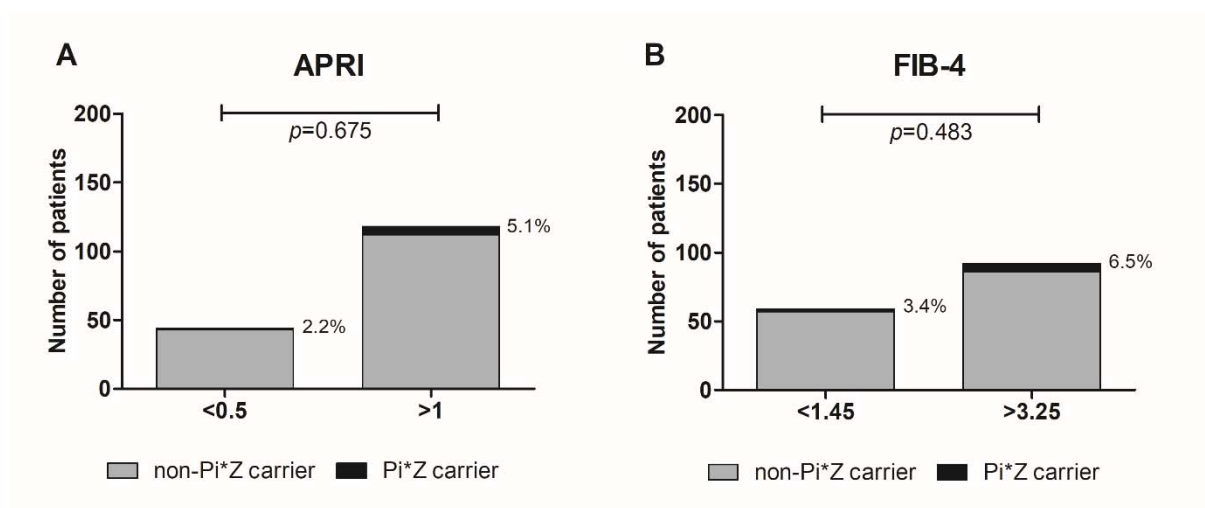

Supplement: s1 [file s1]
